# Supplementary material
Source: PubMed Central journal article supplement (PMC4450081)
Supplement: NIHMS386049-supplement-S1.pdf [file NIHMS386049-supplement-S1.pdf]

**Supplementary Table 2. Haplotype association of 12 SNPs in HMG3 gene with spine bone size**

| Locus                    | Haplotype    | Freq | $\beta$ | P value  |
|--------------------------|--------------|------|---------|----------|
| <b>Initial Discovery</b> |              |      |         |          |
| HAPL-1                   | GGATAATCCCGG | 0.89 | -1.33   | 6.8E-05  |
| HAPL-2                   | AACCCGCGTTAA | 0.09 | 1.57    | 9.3E-06  |
| <b>Replication study</b> |              |      |         |          |
| HAPL-1                   | GGATAATCCCGG | 0.79 | -0.12   | 0.61     |
| HAPL-2                   | AACCCGCGTTAA | 0.08 | 0.16    | 0.66     |
| HAPL-3                   | GGATAATCCCAA | 0.02 | -0.73   | 0.25     |
| HAPL-4                   | GGATAATCCCAG | 0.05 | -0.29   | 0.52     |
| HAPL-5                   | GGATAATCCCGA | 0.02 | -0.31   | 0.68     |
| HAPL-6                   | AACCCGTGTTAA | 0.02 | 1.59    | 1.37E-02 |

1. SNP order in the haplotype: rs17743190|rs3857454|rs3907327|rs17799762

|rs17799805|rs1385530|rs17799462|rs3857453|rs3857449|rs10484943|rs196670

|rs16890720.

2. P value: Haplotype-specific association analysis P value, which was calculated in a quantitative trait association model with the command “—hap-assoc” in the PLINK.
