# Supplementary material
Source: PubMed Central journal article supplement (PMC4450081)
Supplement: NIHMS386049-supplement-S2.pdf [file NIHMS386049-supplement-S2.pdf]

Supplementary Table 1. Other SNPs with strong association (P<1.0E-04) with spine bone size

| SNP ID     | Chr.     | Position | Role       | Gene     | Allele <sup>1</sup> | Bone size         |         |                |      | Height    |      |         |         | Meta-analysis <sup>4</sup> |         |         |      |   |  |   |  |
|------------|----------|----------|------------|----------|---------------------|-------------------|---------|----------------|------|-----------|------|---------|---------|----------------------------|---------|---------|------|---|--|---|--|
|            |          |          |            |          |                     | Initial Discovery |         | Replication    |      | Chinese   |      | P       |         | P(F)                       |         | P (R)   |      | Q |  | I |  |
|            |          |          |            |          |                     | MAF               | $\beta$ | P <sup>2</sup> | MAF  | $\beta^2$ | P    | $\beta$ | P       | P(F)                       | P (R)   | Q       | I    |   |  |   |  |
| rs295948   | 11p13    | 34210736 | intron     | ABTB2    | T/C                 | 0.02              | -1.13   | 9.40E-05       | 0.02 | -0.57     | 0.4  | -0.5    | 8.7E-02 | 8.5E-05                    | 8.5E-05 | 4.4E-01 | 0.0  |   |  |   |  |
| rs2141075  | 7q32.1   | 1.29E+08 | intron     | AHCYL2   | C/T                 | 0.25              | -0.82   | 5.50E-05       | 0.24 | -0.21     | 0.34 | -0.56   | 8.3E-03 | 3.0E-04                    | 8.9E-02 | 4.1E-02 | 76.1 |   |  |   |  |
| rs4895102  | 3q13.11  | 1.06E+08 | upstream   | ALCAM    | T/A                 | 0.36              | 1.07    | 2.70E-05       | 0.36 | -0.05     | 0.8  | 0.86    | 8.7E-04 | 1.8E-02                    | 3.7E-01 | 5.0E-04 | 91.8 |   |  |   |  |
| rs4144913  | 3q13.11  | 1.06E+08 | upstream   | ALCAM    | G/C                 | 0.38              | 1.08    | 2.80E-05       | 0.38 | 0         | 0.99 | 0.8     | 2.0E-03 | 1.2E-02                    | 3.3E-01 | 7.0E-04 | 91.2 |   |  |   |  |
| rs3947979  | 3q13.11  | 1.06E+08 | upstream   | ALCAM    | C/A                 | 0.39              | 1.03    | 7.00E-05       | 0.38 | -0.05     | 0.79 | 0.76    | 3.6E-03 | 3.2E-02                    | 3.8E-01 | 7.0E-04 | 91.2 |   |  |   |  |
| rs2961359  | 3q13.11  | 1.06E+08 | upstream   | ALCAM    | C/G                 | 0.43              | 1.13    | 7.90E-05       | 0.43 | 0.2       | 0.29 | 0.64    | 2.9E-02 | 2.3E-03                    | 1.7E-01 | 6.2E-03 | 86.7 |   |  |   |  |
| rs1004944  | 3q13.11  | 1.06E+08 | upstream   | ALCAM    | T/C                 | 0.38              | 1.17    | 9.30E-05       | 0.38 | -0.26     | 0.17 | 0.65    | 3.2E-02 | 3.3E-01                    | 5.4E-01 | 1.0E-04 | 93.9 |   |  |   |  |
| rs2961318  | 3q13.11  | 1.06E+08 | upstream   | ALCAM    | C/T                 | 0.43              | 1.11    | 9.80E-05       | 0.43 | 0.19      | 0.3  | 0.66    | 2.4E-02 | 2.7E-03                    | 1.7E-01 | 6.9E-03 | 86.3 |   |  |   |  |
| rs10744641 | 12p13.33 | 456668   | intron     | BGALNT3  | C/T                 | 0.5               | -0.85   | 2.90E-05       | 0.5  | 0.32      | 0.09 | -0.4    | 5.5E-02 | 9.6E-02                    | 6.5E-01 | 0.0E+00 | 94.3 |   |  |   |  |
| rs7311655  | 12p13.33 | 456688   | intron     | BGALNT3  | G/T                 | 0.49              | -0.81   | 8.20E-05       | 0.49 | 0.27      | 0.16 | -0.38   | 7.3E-02 | 9.4E-02                    | 6.2E-01 | 1.0E-04 | 93.2 |   |  |   |  |
| rs4727715  | 7q31.1   | 1.08E+08 | downstream | IMMP2L   | A/G                 | 0.45              | 1.42    | 9.70E-05       | 0.45 | 0.06      | 0.73 | 0.7     | 6.3E-02 | 3.7E-02                    | 3.0E-01 | 9.0E-04 | 91.0 |   |  |   |  |
| rs1751779  | 9q21.11  | 71608733 | upstream   | PTAR1    | C/T                 | 0.06              | -1.62   | 3.30E-05       | 0.08 | 0.12      | 0.74 | -0.88   | 2.9E-02 | 1.1E-02                    | 3.9E-01 | 9.0E-04 | 90.9 |   |  |   |  |
| rs6798546  | 3p12.1   | 84021714 | upstream   | CADM2    | G/T                 | 0.49              | 1.08    | 3.70E-05       | 0.49 | -0.24     | 0.2  | 0.74    | 5.7E-03 | 1.8E-01                    | 5.3E-01 | 0.0E+00 | 94.1 |   |  |   |  |
| rs6777459  | 3p12.1   | 84020038 | upstream   | CADM2    | T/C                 | 0.49              | 1.08    | 4.00E-05       | 0.48 | -0.15     | 0.42 | 0.76    | 4.4E-03 | 8.4E-02                    | 4.6E-01 | 1.0E-04 | 93.2 |   |  |   |  |
| rs6777545  | 3p12.1   | 84020084 | upstream   | CADM2    | A/G                 | 0.49              | 1.07    | 4.20E-05       | 0.48 | -0.19     | 0.3  | 0.75    | 5.1E-03 | 1.2E-01                    | 5.0E-01 | 1.0E-04 | 93.6 |   |  |   |  |
| rs8955708  | 3p14.2   | 62595803 | intron     | CADPS    | G/A                 | 0.05              | 1.77    | 8.00E-05       | 0.05 | -0.21     | 0.63 | 1.27    | 4.8E-03 | 1.8E-02                    | 4.3E-01 | 1.4E-03 | 90.2 |   |  |   |  |
| rs1915087  | 3q13.33  | 1.23E+08 | 3UTR       | CD8E     | C/T                 | 0.32              | -0.78   | 7.90E-05       | 0.32 | 0.11      | 0.88 | -0.29   | 1.5E-01 | 1.5E-02                    | 4.5E-01 | 1.6E-03 | 90.0 |   |  |   |  |
| rs6058947  | 20q11.21 | 30787796 | intron     | CCMDM7   | C/T                 | 0.25              | -0.91   | 6.10E-06       | 0.24 | -0.1      | 0.67 | -0.58   | 5.9E-03 | 2.6E-04                    | 2.1E-01 | 6.2E-03 | 86.7 |   |  |   |  |
| rs6058845  | 20q11.21 | 30787580 | intron     | CCMDM7   | T/G                 | 0.24              | -0.91   | 6.60E-06       | 0.23 | 0.02      | 0.94 | -0.56   | 7.3E-03 | 8.9E-04                    | 3.3E-01 | 2.2E-03 | 89.4 |   |  |   |  |
| rs6057632  | 20q11.21 | 30783502 | intron     | CCMDM7   | A/G                 | 0.24              | -0.9    | 8.60E-06       | 0.23 | 0.02      | 0.95 | -0.57   | 6.7E-03 | 1.0E-03                    | 3.3E-01 | 2.5E-03 | 89.1 |   |  |   |  |
| rs6058840  | 20q11.21 | 30782777 | intron     | CCMDM7   | T/A                 | 0.24              | -0.9    | 9.10E-06       | 0.23 | 0.02      | 0.93 | -0.55   | 8.5E-03 | 1.1E-03                    | 3.3E-01 | 2.4E-03 | 89.2 |   |  |   |  |
| rs6057630  | 20q11.21 | 30782398 | intron     | CCMDM7   | A/G                 | 0.24              | -0.87   | 1.60E-05       | 0.23 | 0.06      | 0.8  | -0.56   | 7.7E-03 | 2.1E-03                    | 3.7E-01 | 2.2E-03 | 89.4 |   |  |   |  |
| rs6057628  | 20q11.21 | 30772345 | intron     | CCMDM7   | C/T                 | 0.24              | -0.87   | 1.90E-05       | 0.23 | 0.03      | 0.91 | -0.56   | 7.8E-03 | 1.9E-03                    | 3.4E-01 | 3.1E-03 | 88.6 |   |  |   |  |
| rs1767013  | 15q23    | 69515195 | upstream   | CORO2B   | T/C                 | 0.07              | -2.37   | 8.20E-05       | 0.07 | N/A       | N/A  | -0.53   | 3.9E-01 | N/A                        | N/A     | N/A     | N/A  |   |  |   |  |
| rs32121    | 5p15.2   | 11403359 | intron     | CTNND2   | A/C                 | 0.33              | -0.8    | 9.10E-05       | 0.34 | -0.08     | 0.77 | -0.39   | 6.0E-02 | 2.6E-03                    | 2.4E-01 | 1.1E-02 | 84.4 |   |  |   |  |
| rs6601633  | 8p23.1   | 11842582 | downstream | DEFB137  | T/C                 | 0.45              | 2.27    | 4.00E-05       | 0.45 | -0.15     | 0.43 | 1.78    | 1.9E-03 | 5.6E-01                    | 4.1E-01 | 0.0E+00 | 94.2 |   |  |   |  |
| rs1125018  | 8p23.1   | 11844985 | downstream | DEFB137  | T/A                 | 0.42              | 2.14    | 6.10E-05       | 0.42 | -0.09     | 0.63 | 1.68    | 2.6E-03 | 3.7E-01                    | 3.9E-01 | 1.0E-04 | 93.6 |   |  |   |  |
| rs4840599  | 8p23.1   | 11842789 | downstream | DEFB137  | T/C                 | 0.45              | 2.16    | 8.00E-05       | 0.45 | -0.14     | 0.45 | 1.68    | 3.1E-03 | 5.6E-01                    | 4.1E-01 | 1.0E-04 | 93.7 |   |  |   |  |
| rs821589   | 1q42.2   | 2.3E+08  | intron     | DISC1    | T/C                 | 0.09              | -1.02   | 3.50E-05       | 0.08 | -0.07     | 0.85 | -0.29   | 2.6E-01 | 4.7E-04                    | 2.3E-01 | 2.5E-02 | 80.2 |   |  |   |  |
| rs7963695  | 12p13.2  | 12597000 | intron     | DUSP16   | A/C                 | 0.09              | 0.99    | 7.20E-05       | 0.09 | 0.36      | 0.28 | 0.3     | 2.4E-01 | 1.3E-04                    | 2.4E-02 | 1.2E-01 | 57.7 |   |  |   |  |
| rs764228   | 22q13.2  | 42446194 | intron     | EFCAB6   | G/A                 | 0.42              | -1.3    | 2.70E-06       | 0.42 | 0.22      | 0.28 | -0.81   | 4.8E-03 | 6.3E-02                    | 4.8E-01 | 0.0E+00 | 95.0 |   |  |   |  |
| rs174583   | 11q12.2  | 61366326 | intron     | FADS2    | A/G                 | 0.34              | -0.77   | 8.10E-05       | 0.35 | -0.36     | 0.07 | -0.98   | 1.1E-06 | 4.2E-05                    | 5.6E-03 | 1.4E-01 | 53.8 |   |  |   |  |
| rs9301947  | 13q31.3  | 93714027 | intron     | GPC6     | T/C                 | 0.21              | 0.89    | 2.70E-05       | 0.21 | 0.04      | 0.86 | 0.74    | 7.1E-04 | 1.3E-03                    | 2.7E-01 | 6.8E-03 | 86.4 |   |  |   |  |
| rs9561522  | 13q31.3  | 93714245 | intron     | GPC6     | T/C                 | 0.21              | 0.89    | 3.30E-05       | 0.21 | 0.05      | 0.83 | 0.77    | 5.0E-04 | 1.4E-03                    | 2.6E-01 | 7.5E-03 | 86.0 |   |  |   |  |
| rs7909228  | 10q26.13 | 1.25E+08 | upstream   | HMX3     | A/G                 | 0.37              | -1.25   | 8.60E-05       | 0.37 | 0.36      | 0.08 | -1.28   | 9.1E-05 | 5.4E-01                    | 5.9E-01 | 0.0E+00 | 94.5 |   |  |   |  |
| rs2136768  | 7q31.31  | 1.18E+08 | upstream   | KCNQ2    | G/C                 | 0.44              | 0.99    | 1.30E-05       | 0.44 | -0.08     | 0.69 | 0.26    | 2.7E-01 | 1.2E-02                    | 4.0E-01 | 3.0E-04 | 92.4 |   |  |   |  |
| rs1178712  | 7q31.31  | 1.18E+08 | upstream   | KCNQ2    | C/T                 | 0.44              | 0.97    | 1.50E-05       | 0.44 | -0.07     | 0.71 | 0.23    | 3.1E-01 | 1.2E-02                    | 3.9E-01 | 4.0E-04 | 92.1 |   |  |   |  |
| rs1771631  | 8q22.1   | 95633516 | intron     | KIAA1429 | C/T                 | 0.23              | 1.58    | 5.50E-05       | 0.23 | 0.46      | 0.04 | 1.19    | 3.2E-03 | 1.4E-04                    | 7.9E-02 | 1.3E-02 | 83.8 |   |  |   |  |
| rs4822416  | 22q11.23 | 22146428 | downstream | IGLL1    | G/A                 | 0.4               | -1.11   | 6.70E-05       | 0.4  | -0.21     | 0.27 | -0.52   | 6.8E-02 | 1.5E-03                    | 1.6E-01 | 7.6E-03 | 86.0 |   |  |   |  |
| rs513069   | 11q24.1  | 1.22E+08 | intron     | LOC39995 | T/C                 | 0.32              | -0.85   | 6.70E-05       | 0.32 | -0.15     | 0.47 | -0.36   | 9.4E-02 | 1.0E-03                    | 1.6E-01 | 1.7E-02 | 82.6 |   |  |   |  |
| rs512932   | 11q24.1  | 1.21E+08 | intron     | LOC39995 | C/T                 | 0.22              | -0.9    | 9.90E-05       | 0.22 | -0.15     | 0.52 | -0.32   | 1.7E-01 | 1.4E-03                    | 1.7E-01 | 2.0E-02 | 81.5 |   |  |   |  |
| rs2025685  | 10p15.3  | 2321425  | upstream   | PFKP     | G/A                 | 0.47              | 0.82    | 3.80E-05       | 0.46 | -0.12     | 0.51 | 0.54    | 7.9E-03 | 1.9E-02                    | 4.6E-01 | 5.0E-04 | 91.7 |   |  |   |  |
| rs1330680  | 16p21    | 62625490 | upstream   | CH9      | G/T                 | 0.45              | 0.91    | 9.20E-05       | 0.45 | -0.19     | 0.31 | 0.21    | 3.7E-01 | 9.2E-02                    | 5.2E-01 | 2.0E-04 | 92.6 |   |  |   |  |
| rs10836631 | 11p12    | 36890059 | downstream | LRRCC4   | A/G                 | 0.31              | 0.84    | 8.50E-05       | 0.32 | 0.02      | 0.93 | 0.59    | 7.8E-03 | 5.6E-03                    | 3.0E-01 | 5.1E-03 | 87.3 |   |  |   |  |
| rs260140   | 13q21.2  | 66540918 | intron     | PCDH9    | T/C                 | 0.11              | -2.46   | 4.30E-05       | 0.11 | 0.18      | 0.56 | -1.81   | 2.6E-03 | 1.8E-01                    | 4.1E-01 | 1.0E-04 | 93.5 |   |  |   |  |
| rs1687891  | 5q11.2   | 50809847 | upstream   | PELO     | T/A                 | 0.36              | -1.06   | 4.90E-05       | 0.37 | 0.1       | 0.61 | -1.3    | 9.5E-07 | 4.1E-02                    | 4.2E-01 | 4.0E-04 | 92.1 |   |  |   |  |
| rs6610660  | Xp11.4   | 41854099 | upstream   | CASK     | A/G                 | 0.05              | -1.01   | 9.80E-05       | 0.05 | -0.28     | 0.54 | -0.69   | 8.0E-03 | 2.2E-04                    | 3.6E-02 | 1.6E-01 | 48.6 |   |  |   |  |
| rs1775814  | 11q14.2  | 86104990 | upstream   | PRSS23   | C/T                 | 0.17              | 1.13    | 6.20E-05       | 0.17 | -0.35     | 0.16 | 0.56    | 5.3E-02 | 1.1E-01                    | 6.1E-01 | 1.0E-04 | 93.6 |   |  |   |  |
| rs413553   | 9p23     | 10078517 | intron     | PPRD     | T/C                 | 0.44              | 1.31    | 3.00E-05       | 0.44 | -0.38     | 0.05 | 1       | 1.9E-03 | 5.9E-01                    | 6.0E-01 | 0.0E+00 | 95.3 |   |  |   |  |
| rs7470838  | 9p23     | 9952381  | intron     | PPRD     | A/G                 | 0.28              | -0.79   | 8.70E-05       | 0.28 | 0.02      | 0.92 | -0.38   | 6.9E-02 | 5.2E-03                    | 3.4E-01 | 5.6E-03 | 87.0 |   |  |   |  |
| rs1891203  | 14q12.1  | 2.27E+08 | upstream   | RAB4A    | G/T                 | 0.21              | -1.35   | 5.70E-05       | 0.21 | -0.23     | 0.32 | -0.58   | 9.2E-02 | 1.9E-03                    | 1.7E-01 | 5.8E-03 | 86.9 |   |  |   |  |
| rs1779818  | 8q22.1   | 95406477 | downstream | RAD54B   | C/T                 | 0.05              | 1.65    | 6.20E-05       | 0.04 | 0.74      | 0.11 | 1.16    | 6.6E-03 | 4.8E-05                    | 8.0E-03 | 1.4E-01 | 55.1 |   |  |   |  |
| rs2014429  | 11p13    | 31897611 | upstream   | RCN1     | A/G                 | 0.29              | 0.83    | 3.60E-05       | 0.3  | -0.01     | 0.98 | 0.66    | 1.2E-03 | 3.2E-03                    | 3.2E-01 | 3.6E-03 | 88.2 |   |  |   |  |
| rs6484545  | 11p13    | 31912507 | upstream   | RCN1     | A/T                 | 0.22              | 0.79    | 9.90E-05       | 0.22 | -0.1      | 0.66 | 0.71    | 5.8E-04 | 7.9E-03                    | 4.3E-01 | 3.8E-03 | 88.0 |   |  |   |  |
| rs2827939  | 21q22.2  | 23442973 | upstream   | RPL13A   | A/C                 | 0.15              | 0.85    | 9.10E-05       | 0.15 | 0.02      | 0.94 | 0.64    | 4.8E-03 | 2.2E-03                    | 2.8E-01 | 1.4E-02 | 83.3 |   |  |   |  |
| rs706922   | 6q21     | 1.14E+08 | upstream   | MARCKS   | G/A                 | 0.1               | 2.39    | 9.90E-05       | 0.1  | 0.02      | 0.96 | -0.37   | 1.2E-01 | 8.5E-02                    | 3.5E-01 | 5.0E-04 | 91.9 |   |  |   |  |
| rs1696074  | 16p13.12 | 12815810 | downstream | SNORA27  | A/G                 | 0.03              | -0.97   | 3.80E-05       | 0.03 | -0.86     | 0.14 | -0.71   | 2.7E-03 | 1.1E-05                    | 1.1E-05 | 8.6E-01 | 0.0  |   |  |   |  |
| rs4012246  | 3q27.3   | 1.88E+08 | intron     | ST6GAL1  | C/T                 | 0.43              | -0.86   | 5.60E-05       | 0.43 | -0.07     | 0.72 | -0.45   | 3.8E-02 | 2.8E-03                    | 2.4E-01 | 6.1E-03 | 86.7 |   |  |   |  |
| rs1189992  | 2q22.1   | 1.38E+08 | intron     | THSD7B   | C/T                 | 0.08              | 2.78    | 9.90E-05       | 0.08 | -0.21     | 0.55 | 1.57    | 2.8E-02 | 2.4E-01                    | 4.1E-01 | 2.0E-04 | 93.0 |   |  |   |  |
| rs1162906  | 14q32.11 | 90220389 | intron     | TTCTB    | T/C                 | 0.15              | 1.27    | 9.50E-05       | 0.15 | 0.48      | 0.07 | 1.06    | 1.3E-03 | 1.0E-04                    | 3.0E-02 | 6.0E-02 | 71.7 |   |  |   |  |
| rs16999571 | Xq25     | 1.29E+08 | upstream   | UTP14A   | A/T                 | 0.02              | 0.8     | 1.10E-05       | 0.02 | 0.26      | 0.69 | 0.37    | 4.9E-02 | 1.4E-05                    | 1.4E-05 | 4.3E-01 | 0.0  |   |  |   |  |
| rs926598   | Xq25     | 1.29E+08 | upstream   | UTP14A   | C/G                 | 0.02              | 0.78    | 1.60E-05       | 0.02 | 0.18      | 0.8  | 0.4     | 3.0E-02 | 2.2E-05                    | 2.2E-05 | 3.9E-01 | 0.0  |   |  |   |  |
| rs636493   | 20q13.12 | 44543741 | intron     | ZNF840   | G/A                 | 0.17              | 2.1     | 8.80E-05       | 0.16 | -0.26     | 0.31 | 0.81    | 1.2E-01 | 4.3E-01                    | 4.6E-01 | 1.0E-04 | 93.7 |   |  |   |  |

1. The first allele represents the minor allele of each SNP.

2. P values after correction of population stratification: EIGENSTRAT was employed to calculate the principal components and the ten default main eigenvectors were used as covariate to adjust BS.

3. The direction of effect indicated by  $\beta$  is calculated for minor allele.
